1 **Title**

2 Plasma-derived cell-free DNA methylomes might not enable detection and discrimination of  
3 intracranial tumors.

4  
5 **Running title**

6 Matters Arising from Nassiri *et al.* Nat. Med. 2020

7  
8 **Authors**

9 Kristoffer Vitting-Seerup<sup>1</sup>

10

11 **Affiliations**

12 <sup>1</sup>The Bioinformatics Section, Department of Health Technology, The Technical University of  
13 Denmark (DTU), Denmark.

14

15 **Contact**

16 k.vitting.seerup@gmail.com

17

18 **Abstract**

19 Intracranial tumors are both hard to detect and diagnose, resulting in poor patient outcomes. For that  
20 reason, non-invasive methods enabling detection and discrimination of intracranial tumors have  
21 significant clinical potential. Recently Nassiri *et al.*<sup>1</sup> propose plasma-derived cell-free DNA  
22 methylomes as such a method. Here I show that the results have been misinterpreted, and for many  
23 comparisons, no evidence supporting the conclusions are actually presented. While my analysis  
24 highlights the potential of plasma-derived cell-free DNA methylomes, the evidence provided by  
25 Nassiri *et al.*<sup>1</sup> is simply currently insufficient.

26

27 **Introduction**

28 Intracranial tumors are notoriously difficult to detect since most symptoms, such as headaches, are  
29 nonspecific and frequently occur in healthy people<sup>2</sup>. These tumors, therefore, often go unnoticed,  
30 resulting in late discovery and thereby worse patient outcomes<sup>2</sup>. When intracranial tumors are  
31 discovered, highly invasive intracranial surgery is needed to confirm and elaborate on the diagnosis<sup>1</sup>.  
32 Non-invasive diagnosis approaches capable of detecting and discriminating intracranial tumors could  
33 be vital for both screening and diagnosis purposes, ultimately improving patient outcomes.

34

## 35 **Results**

36 To this end, Nassiri *et al.*<sup>1</sup> recently reported they could detect and discriminate intracranial tumors  
37 using plasma-derived cell-free DNA methylomes. In their study, they created plasma-derived  
38 methylome profiles for 220 patients with various types of intracranial tumors. These methylome  
39 profiles were then combined with previously published methylome profiles from other cancer types  
40 and healthy controls (n=447). Using this dataset, Nassiri *et al.* test whether gliomas can be  
41 distinguished from extracranial samples and whether intracranial tumors can be distinguished from  
42 each other. In both cases, the analysis is framed as a one-vs-rest classification problem (e.g., glioma  
43 vs. all extracranial samples). Performance was measured on held-out validation data and reported as  
44 Area Under receiver operator Curve (AUC).

45

46 Combining a one-vs-rest framing (e.g., 60 gliomas vs. 447 extracranial samples) and measuring  
47 performance with AUCs is, however, potentially problematic. The problem is that AUCs can be  
48 misleading (or rather, misinterpreted) when applied to a classification problem where the numbers of  
49 samples in one class (e.g., 60 gliomas) is severely outnumbered by the number of samples in the other  
50 class (e.g., 447 extracranial)<sup>3</sup>. For such an imbalanced dataset, the problem arises because a model  
51 that predicts all samples as the major class (e.g., extracranial) can appear appealing when only using  
52 performance metrics such as accuracy and AUCs. The overall performance will simply seem adequate  
53 as the error caused by the misclassification of the minor group is negligible. But such a model is  
54 naturally not desirable. In the case of the glioma vs. extracranial classification, a model that predicts  
55 all samples as extracranial would have no clinical value. A common approach to avoiding this  
56 problem is to evaluate performance by measuring sensitivity and specificity<sup>3</sup>. Sensitivity and  
57 specificity, respectively, measure how large a fraction of each class was correctly predicted. It follows  
58 that one of them will be zero for the scenario where no minor class was predicted, whereby these  
59 problematic models can be avoided.

60

61 To investigate if the analysis done by Nassiri *et al.*<sup>1</sup> was robust to the problems caused by their  
62 imbalanced dataset, I re-analyze the predictions made (and provided) by Nassiri *et al.* using additional  
63 performance metrics. From this, it is clear that the analysis done by Nassiri *et al.* is currently not  
64 robust to the imbalanced nature of the datasets.

65

66 The problem with imbalanced datasets is most prominent for the analysis of intracranial samples.  
67 Here Nassiri *et al.*<sup>1</sup> analyze 161 intracranial cancer samples originate from 6 different cancer types:  
68 IDH mutant gliomas (n=41), IDH wild-type gliomas (n=22), 60 meningiomas, 9  
69 hemangiopericytomas, 14 low-grade glial–neuronal tumors, and 15 brain metastases. To determine if  
70 one cancer type can be distinguished from the other cancer types, they use the one-vs-rest approach.  
71 This means they train a model to distinguish the 14 low-grade glial–neuronal tumors from all the 147  
72 other cancer samples (8.7% vs. 91.3%). As reported in Nassiri *et al.*<sup>1</sup>, the average resulting AUC for  
73 this comparison is 0.93. When inspected more thoroughly it the high AUC originate from classifying  
74 all samples as ‘other’. In other words, no samples were actually classified as low-grade glial–neuronal  
75 tumors (Figure 1, leftmost plot). I find this exact pattern for four of the six cancer types (Figure 1),  
76 meaning these results have no clinical potential. The only cancer type with some performance was  
77 Meningioma, where 68% of Meningioma samples were correctly classified. While this result is  
78 probably still too low for any clinical applications, it indicates the potential of the data. Unfortunately,  
79 Nassiri *et al.*<sup>1</sup> currently does not provide the evidence to conclude that plasma-derived cell-free DNA  
80 methylomes enable discrimination of intracranial tumors.

81

82 Apart from the intracranial analysis, Nassiri *et al.*<sup>1</sup> also seek to determine if intracranial tumors can  
83 be distinguished from extracranial samples. Here a one-vs-rest approach is used to compare glioma  
84 samples to a dataset containing both other cancer types and healthy controls. This corresponds to  
85 comparing 60 gliomas samples (11.8%) to 447 non-gliomas samples (88.2%), meaning it is also an  
86 imbalanced dataset. As reported in Nassiri *et al.*<sup>1</sup>, this comparison yields an average AUROC is 0.99,  
87 which considering a score of 1 indicates perfect classification, could seem very impressive. Such a  
88 conclusion would, however, be a misinterpretation of the AUROC values. When analyzed with  
89 additional performance metrics, the analysis has a median sensitivity of 0.818 (Figure 2A). The  
90 corresponding False Negative Rate (FNR) indicates that approximately 1 in 5 glioma patients would  
91 not be identified (Figure 2A). While the sensitivity indicates a clear potential, it still means Nassiri *et al.*<sup>1</sup>  
92 currently provide insufficient evidence to conclude plasma-derived cell-free DNA methylomes  
93 enable detection of intracranial tumors.

94

95 Another potential problem with the analysis of gliomas vs. extracranial samples is that Nassiri *et al.*<sup>1</sup>  
96 combine three distinct datasets originating from different laboratories (and distinct points in time).  
97 The joining of the datasets potentially results in batch effects where systematic variation between

98 samples is introduced because of differences in the laboratory conditions (e.g., temperature),  
99 personnel, etc.<sup>4</sup>. We know batch effects exist in the data analyzed by Nassiri *et al.* as they point to  
100 batch effects as the reason the data is analyzed as two individual cohorts (instead of one combined)<sup>1</sup>.  
101 It is, however, currently unclear how Nassiri *et al.* have corrected other potential batch effects as this  
102 is not described in the method section. It does, however, appear that batch effects have not been  
103 adequately handled as the glioma samples appear as two distinct clusters in a PCA analysis (Figure  
104 2B) (also seen from Figure 1G in Nassiri *et al.*<sup>1</sup>). This clustering could result from a batch effect - a  
105 hypothesis supported by the clusters not being explained by the available clinical meta-data (Figure  
106 2C).

107

## 108 **Conclusion**

109 In summary, due to both poor classification performance and potential batch effects, Nassiri *et al.*<sup>1</sup>  
110 currently provide insufficient evidence to conclude that plasma-derived cell-free DNA methylomes  
111 enable detection and discrimination of intracranial tumors.

112

## 113 **Methods**

114 The processed data, the scripts created, and the classification predictions made by Nassiri *et al.* were  
115 downloaded from their Zenodo repository ([www.doi.org/10.5281/zenodo.3715312](http://www.doi.org/10.5281/zenodo.3715312)). A Rmarkdown  
116 document reproducing the analysis presented here can be found on Figshare  
117 (<http://doi.org/10.6084/m9.figshare.14406866.v1>). Performance metrics were calculated as defined  
118 defined in Saito *et al.*<sup>3</sup>.

## 119 **References**

- 120 1. Nassiri, F. *et al.* Detection and discrimination of intracranial tumors using plasma cell-free  
121 DNA methylomes. *Nat. Med.* **26**, 1044–1047 (2020).
- 122 2. Silantyev, A. S. *et al.* Current and Future Trends on Diagnosis and Prognosis of  
123 Glioblastoma: From Molecular Biology to Proteomics. *Cells* **8**, (2019).
- 124 3. Saito, T. & Rehmsmeier, M. The precision-recall plot is more informative than the ROC plot  
125 when evaluating binary classifiers on imbalanced datasets. *PLoS One* **10**, 1–21 (2015).
- 126 4. Leek, J. T. *et al.* Tackling the widespread and critical impact of batch effects in high-

127 throughput data. *Nat. Rev. Genet.* **11**, 733–739 (2010).

128

# Figure 1

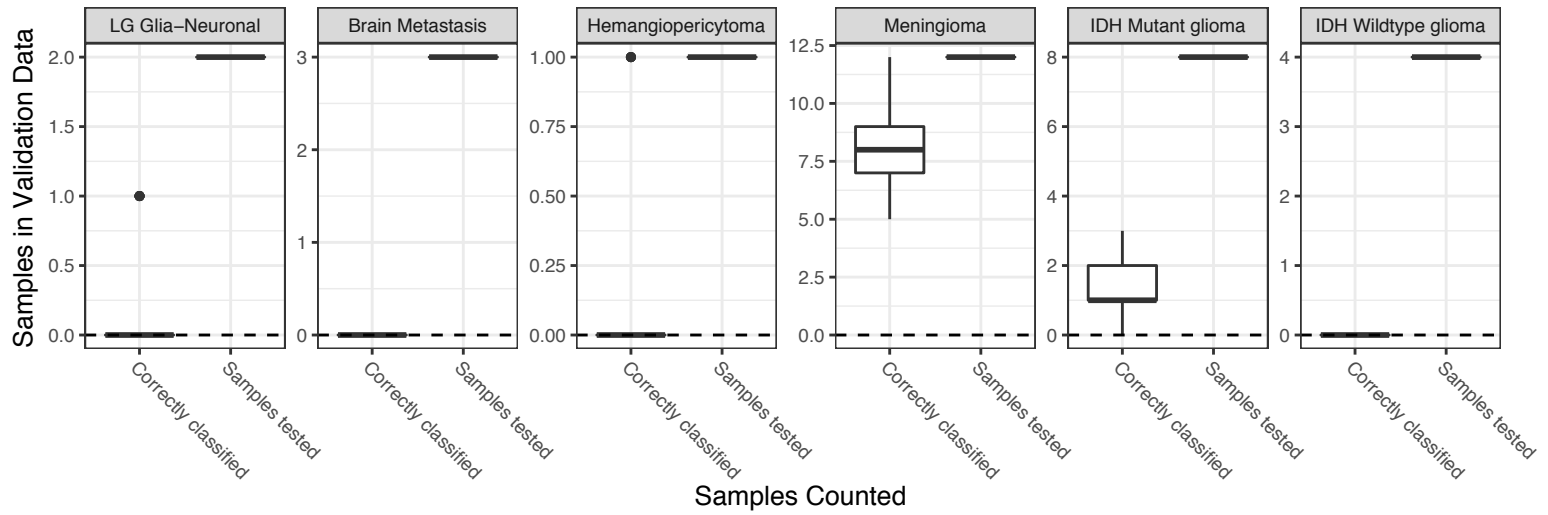

**Figure 1:** Distinguishing intracranial tumors. For each tumor type (sub-plots), the number of samples (y-axis) tested and the number of samples correctly classified (x-axis) for the 50 iterations of prediction on held-out data provided by Nassiri *et al.*

## Figure 2

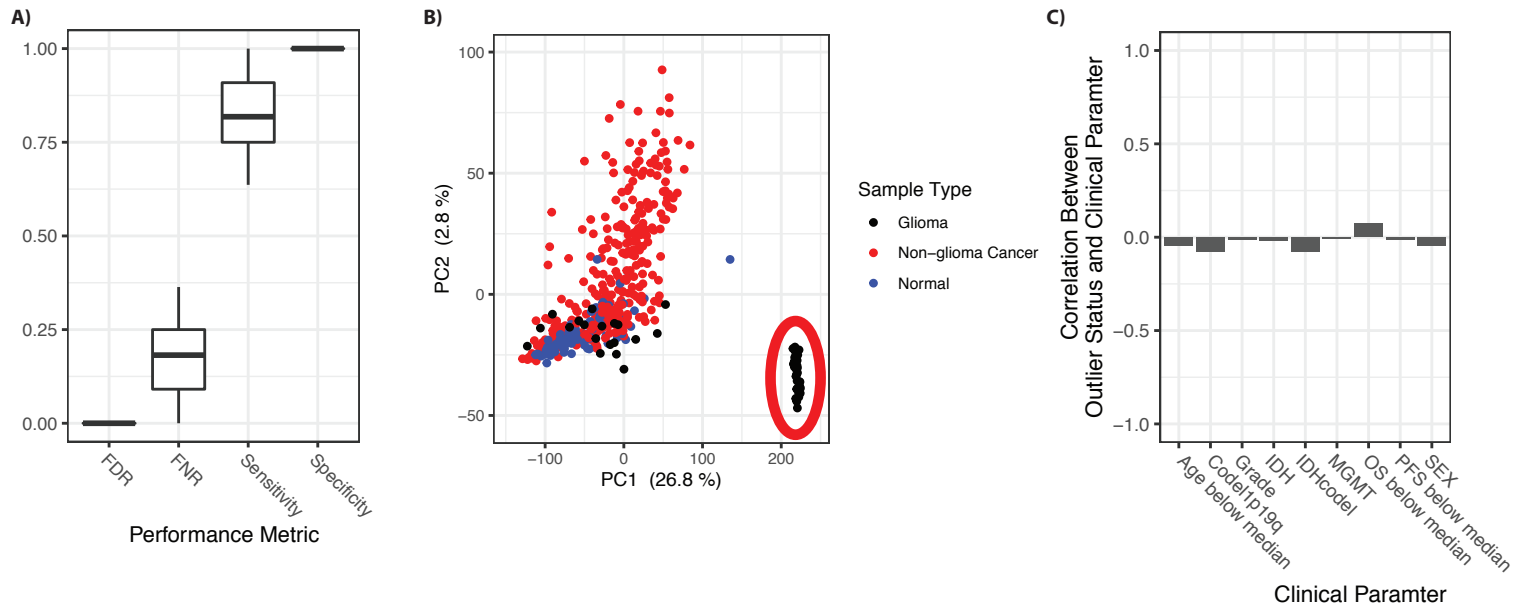

**Figure 2:** Detecting intracranial tumors. **A)** The x-axis indicates the different performance metrics calculated directly from the predictions provided in Nassiri et al. Y-axis indicates the performance for the 50 iterations of prediction on held-out data provided by Nassiri *et al.* **B)** PCA plots of the 25,000 most informative methylated regions show the clustering of glioma and extracranial samples. Samples are colored by type, and a red ellipse highlights the glioma outliers. **C)** Correlation between glioma outlier status (as defined in B) and clinical metadata. OS: Overall Survival. PFS: Progression Free Survival.
